# Fractional Dosing of Yellow Fever Vaccine to Extend Supply: A Modeling Study

## AUTHORS

Joseph T. Wu<sup>1</sup>, PhD, joewu@hku.hk\*

Corey M. Peak<sup>2</sup>, MS

Prof Gabriel M. Leung<sup>1</sup>, MD

Prof Marc Lipsitch<sup>2,3</sup>, DPhil mlipsitc@hsph.harvard.edu\*

<sup>1</sup>WHO Collaborating Centre for Infectious Disease Epidemiology and Control, School of Public Health, Li Ka Shing Faculty of Medicine, The University of Hong Kong, Hong Kong Special Administrative Region, China

<sup>2</sup>Center for Communicable Disease Dynamics, Department of Epidemiology, Harvard T.H. Chan School of Public Health, 677 Huntington Avenue, Boston MA 02115 USA

<sup>3</sup>Department of Immunology and Infectious Diseases, Harvard T.H. Chan School of Public Health, 665 Huntington Avenue, Boston MA 02115 USA. +1-617-432-4559.

\* corresponding authors

## Background

The ongoing yellow fever (YF) epidemic in Angola is placing strain on the global vaccine supply. In order to extend vaccine supply and reduce the cost of mass-vaccination, dose sparing by fractional-dose vaccination has received heightened consideration. Five-fold fractionation is similar to the standard dose in safety and immunogenicity. However, no YF vaccine efficacy trials have been performed in humans, so it is possible that fractional-dose vaccines may be less efficacious even if equally immunogenic. There is an urgent need to study under what conditions fractional dosing could provide epidemiologic benefits in reducing transmission.

## Methods

We estimated the effective reproductive number for YF in Angola using disease natural history and case report data. Using these results and simple mathematical models of YF transmission, we calculated the expected final size of an epidemic under varying levels of vaccine coverage with standard-dose vaccines and up to five-fold fractionation with varying efficacy. We consider two allocation scenarios: random and whereby children receive standard-dose vaccines while adults receive fractional-dose vaccines.

## Findings

The effective reproductive number early in the outbreak ranged from approximately 5.2 to 7.1 transmission events per infectious individual. Intuition dictates, and we confirm with modeling analysis, that five-fold fractional-doses can dramatically reduce the final epidemic size. If vaccine efficacy is all-or-nothing, as we expect, the conclusion holds that  $n$ -fold fractionation is beneficial as long as the efficacy is greater than  $1/n$ . We quantify how the threshold becomes more stringent if fractional vaccines instead provide partial protection to every recipient (i.e. “leaky” vaccine action).

45

46 **Interpretation**

47 We conclude that dose fractionation could be a very effective strategy for reducing infection  
48 attack rate in populations with a large margin of error in case fractional-dose efficacy turns out  
49 to be lower than expected.

50

51 **Funding**

52 NIH-MIDAS, HMRS-Hong Kong

## INTRODUCTION

Yellow fever (YF) has resurged in Angola and threatens to spread to other countries with relatively low YF vaccine coverage. As of June 16, YF cases have been exported from Angola to Kenya (2 cases), China (11), and DRC (53), raising concern YF could resurge in other populations where competent vectors are present and vaccine coverage is low, especially during the rainy season which is beginning in West Africa.<sup>1,2</sup> A broad band of sub-Saharan Africa north of Namibia and Zambia is at risk (<http://www.cdc.gov/yellowfever/maps/africa.html>), as is much of the northern portion of South America ([http://www.cdc.gov/yellowfever/maps/south\\_america.html](http://www.cdc.gov/yellowfever/maps/south_america.html)). The global community is increasingly concerned for the risk of YF emergence in Asia, where the disease has been curiously absent despite seemingly amenable conditions.

There is a safe, highly effective live-attenuated vaccine against YF.<sup>3</sup> However, the global emergency stockpile of YF vaccines is low, with approximately 6.8 million doses currently available and 2-4 million more doses expected per month.<sup>1</sup> Given the large populations at risk for YF infection, the stockpile is expected to be inadequate to meet the need.<sup>4</sup> For this reason, the WHO is considering the possibility of dose-sparing by fractional-dose vaccination,<sup>5</sup> in which smaller volumes of vaccine would be used per dose in order to increase the number of persons who can be vaccinated with a given quantity of vaccine.<sup>3</sup> This strategy was previously proposed to extend pre-pandemic influenza vaccine supplies.<sup>6</sup> If dose-fractionation were consistently adopted, equity of YF vaccine access might also be enhanced both within and across countries at risk, as more people could benefit from vaccination without depriving others.<sup>7</sup>

A randomized, noninferiority trial has shown that 0.1 ml intradermal (ID) vaccination with the 17D YF vaccine was equally safe and immunogenic compared to the standard 0.5ml subcutaneous vaccination.<sup>8</sup> Another randomized trial of subcutaneous administration of the 17DD vaccine given in Brazil showed that there was no significant difference in immunogenicity and viremia kinetics when the currently administered vaccine (containing 27,476 IU of virus) was given at subdoses as low as 11% of the full dose (3,013 IU).<sup>9</sup> Even lower doses produced noninferior immune responses, but not equivalent viremia kinetics.<sup>9</sup> For comparison, the WHO minimum for YF vaccines is 1,000 IU per dose at the end of shelf life.<sup>10</sup>

No efficacy trial of YF vaccines has been performed in humans,<sup>11</sup> so the comparative efficacy of different doses and routes of administration remains uncertain. In particular, it is not known whether equal immunogenicity implies equal vaccine efficacy for YF vaccines. Moreover, the findings of equal immunogenicity of reduced doses are limited to healthy adults; no comparable data exist in children, elderly or immunocompromised individuals (e.g. HIV-infected people, pregnant women, etc). As such, while noninferior immunogenicity of fractional-dose vaccines provide a strong basis for an initial consideration of dose-sparing strategies for YF vaccines, it is unlikely that decision makers would change dosing recommendations without carefully evaluating the risk and implications of reduced vaccine efficacy in fractional-dose vaccines. Such an evaluation is nontrivial because even if dose fractionation reduces vaccine efficacy, higher vaccine coverage may confer higher population-level herd immunity in which

case the number of infections could be significantly reduced by the indirect effect of large-scale vaccination.<sup>12</sup> The lower the transmissibility, the larger the number of infections that can be averted by indirect protection, as has been illustrated by the previous study of dose-fractionation for pre-pandemic influenza vaccines.<sup>6</sup> The importance of herd immunity for YF vaccination is unknown because transmissibility of YF in urban settings has so far been poorly characterized due to limited data.

To strengthen the evidence base for the public health impact of dose-fractionation of YF vaccines, we use simple mathematical models to assess the potential reduction in infection attack rate (IAR, defined as the proportion of population infected over the course of an epidemic) conferred by five-fold dose-fractionation under different epidemic scenarios and reductions in vaccine efficacy. We first estimate the transmissibility of YF during the recent Angola outbreak in order to parameterize realistic epidemic scenarios. We then show that even if vaccine efficacy for five-fold fractional-dose vaccination were considerably lower, higher vaccine coverage could achieve significant reduction in IAR despite lower individual-level efficacy, with the break-even point being 20% efficacy under the assumption that reduced efficacy represents a mix of complete efficacy in some individuals and failure in others (“all-or-nothing”), but higher if vaccines are partially effective in all individuals (“leaky”). Next, given the lack of comparative immunogenicity data for fractional-dose YF vaccination in children, we consider the results of a strategy that provides standard-dose vaccines to children and fractional-dose vaccines to adults. We find that all dose-sparing strategies considered could provide significant benefit epidemiologically, and that the best policy will be determined by balancing logistical and regulatory considerations against the extent of epidemiologic benefit.

# METHODS

## Estimating the epidemiologic parameters for YF

To parameterize realistic epidemic scenarios for our analysis, we estimate the reproductive number of YF over the course of the Angola outbreak and use the estimates during the early epidemic stages (before large-scale vaccination affected transmission) as the range of basic reproductive number for future outbreaks in other populations. To this end, we use the Wallinga and Teunis method<sup>13</sup> to estimate the reproductive number of YF from the daily number of confirmed YF cases recorded in the 17 April 2016 WHO Angola Situation Report,<sup>14</sup> assuming that all cases were attributed to local transmission (i.e. no importation of cases). When estimating the extrinsic incubation period, we assume that the average temperature in Angola was 28 degrees Celsius during the outbreak. To estimate the serial interval distribution, we make the following assumptions: (i) the extrinsic incubation period follows the Weibull distribution estimated by ref.<sup>15</sup> which has mean 12.7 days at 28 degrees Celsius; (ii) the intrinsic incubation period follows the lognormal distribution estimated by ref.<sup>15</sup> which has mean 4.6 days; (iii) the infectious period in human is exponentially distributed with mean 4 days;<sup>16</sup> (iv) the mosquito lifespan is exponentially distributed with mean 7 to 14 days.<sup>17</sup> We estimate the initial reproductive number of the YF outbreak in Angola as the average reproductive number among all cases who developed symptoms one serial interval before vaccination campaign began to affect disease transmission (see Figure 1).

## Dose-response for fractional-dose vaccines

Let  $S_0$  be the proportion of population susceptible just before the vaccination campaign begins and  $V$  be the vaccine coverage achievable with standard-dose vaccines. Suppose each standard-dose vaccine can be fractionated into  $n$ ,  $n$ -fold fractional-dose vaccines (i.e. each of which contains  $1/n$ -th the amount of the antigen in a standard-dose vaccine) with vaccine efficacy  $VE(n)$ . That is, the vaccine efficacy of standard-dose vaccines is  $VE(1)$  which was assumed to be 1. Given  $V$ , the highest fractionation sensible is  $n_{\max} = S_0/V$  if the susceptible population can be identified for targeted vaccination and  $n_{\max} = 1/V$  otherwise, i.e. the fractionation  $n$  must lie between 1 and  $n_{\max}$ . To avoid overstating the benefit of dose-fractionation, we assume that vaccine efficacy of  $n$ -fold fractional-dose vaccines for  $n$  between 1 and 5 increases linearly with the amount of antigen in the vaccines (see appendix for more details). Potential increases in vaccine wastage during dose-sparing would be mostly due to unused, reconstituted vaccines<sup>18</sup> or increased vaccine failure due to inexperience with intradermal administration among vaccinators. In the setting of mass vaccination campaigns, wastage due to unused vaccine doses will likely to be negligible because vaccination sessions will be large. Increased vaccine failure is effectively the same as reduced vaccine efficacy if vaccine action is all-or-nothing (as we have assumed in the main text). As such, for simplicity, we do not explicitly model wastage.

## Infection attack rate

We use infection attack rate or IAR (defined as the proportion of population infected over the course of an epidemic) as the outcome measure for evaluating the impact of dose-

fractionation. We calculate IAR using the classical final size approach which is exact for directly transmitted SIR-type diseases<sup>19</sup> but only an approximation for vector-borne diseases.<sup>20</sup> Nonetheless, this approximation is excellent over realistic parameter ranges because only a very small proportion of mosquitoes are infected with YF virus even during epidemics (necessitating pooled testing).<sup>21</sup> See appendix for the mathematical details.

We denote the IAR under  $n$ -fold dose fractionation by  $IAR(n)$ . To evaluate the outcome of fractional-dose vaccination against that of standard-dose vaccination, we calculate the absolute and relative reductions in IAR as  $IAR(1) - IAR(n)$  and  $1 - IAR(n) / IAR(1)$ , respectively. We assume that the vaccination campaign is completed before the start of the epidemic.

### Vaccine action

We assume that vaccine action is all-or-nothing, i.e.  $n$ -fold fractional-dose vaccines provide 100% protection against infection in a proportion  $VE(n)$  of vaccinees and no protection in the remainder. In this case,  $n$ -fold dose fractionation results in lower IAR if and only if the vaccine efficacy of  $n$ -fold fractional-dose vaccines are at least  $1/n$  times that of standard-dose vaccines, i.e.  $VE(n) > VE(1) / n$  (see appendix for details). We term this the benefit threshold for dose-fractionation. We also consider the alternative case in which vaccine action is leaky, i.e.  $n$ -fold fractional-dose vaccines reduce the hazard of infection (the probability of disease transmission per mosquito bite) of each vaccinee by a proportion  $VE(n)$ .<sup>22,23</sup> Compared to all-or-nothing vaccines, leaky vaccines have substantially higher benefit thresholds, especially when transmissibility is high (see Results). However, we postulate that vaccine action is much more likely to be all-or-nothing than leaky (see Discussion). As such, we present our main results in the context of all-or-nothing vaccine action.

### Dose-sparing strategies

We consider two dose-sparing strategies with at most five folds of dose fractionation:

1. *Random vaccination.* Each individual in the population has the same probability of receiving vaccination regardless of their susceptibility. That is, the susceptible and immune population are indiscernible, so targeted vaccination is not possible. If susceptible individuals can be identified, then targeted vaccination has the same epidemiologic outcome as random vaccination with vaccine coverage  $V / S_0$ .
2. *Standard-dose vaccination of children, fractional-dose vaccination of adults.* We assume that children have vaccine priority. That is, all children receive standard-dose vaccines before adults begin to receive fractional-dose vaccines. Let  $p$  be the proportion of adults in the population. For a given standard-dose vaccine coverage  $V$ , the proportion of children vaccinated is  $V_{children} = \min(V, 1 - p)$ . If the stockpile is large enough to vaccinate all children (i.e.  $V > 1 - p$ ), then adults receive  $n$ -fold fractional-dose vaccination where  $n = \min(5, p / (V - 1 + p))$ . The proportion of adults vaccinated is  $V_{adults} = 1$  if  $n < 5$  and  $V_{adults} = 5(V - 1 + p) / p$  otherwise. Given the vector-borne nature of yellow fever we assume that transmission between children and adults is well-mixed.

We assume that all individuals are susceptible before vaccination ( $S_0 = 1$ ) unless specified otherwise.

## Role of the funding source

The sponsors of the study had no role in the study design, data collection, data analysis, writing of the report, or the decision to publish. All authors had access to the data; the corresponding authors had final responsibility to submit for publication.

## RESULTS

**Reproductive number of yellow fever in Angola.** Figure 1 shows that the initial reproductive number of YF in Angola was 5.2 (95% CI 4.3, 6.1) and 7.1 (5.5, 8.7) if the mean mosquito lifespan was 7 and 14 days, respectively. While these estimates may reflect partial immunity due to prior vaccination or exposure among some of the population, we assume that the possible basic reproductive number ( $R_0$ ) in a future outbreak in another population would range between 4 and 12 due to varying vector ecology and levels of preexisting immunity in the population. In principle, disease transmission can be halted if the effective vaccine coverage (defined as vaccine efficacy times vaccine coverage) exceeds the herd immunity threshold  $1 - 1/R_0$ .

**Random vaccination.** Figure 2A shows the IAR under standard-dose and fractional-dose vaccination as a function of standard-dose vaccine coverage  $V$  given varying levels of transmission and five-fold fractionation vaccine efficacy. Figures 2B-C show the corresponding absolute and relative reduction in IAR when vaccine action is all-or-nothing and confirm our earlier claim that fractional-dose vaccination reduces IAR when  $VE(5) > VE(1)/n = 0.2$ . Fractional-dose vaccination substantially reduces IAR if  $V > 10\%$  and such reduction only diminishes to insignificant levels when  $V$  is close to the herd immunity threshold  $(1 - 1/R_0) \times 100\%$  (e.g. 75% and 88% for  $R_0 = 4$  and 8, respectively). In short, dose-fractionation reduces IAR when (i) the standard-dose vaccine supply is insufficient to halt disease transmission and (ii) fractional-dose vaccine efficacy is above 20%.

If vaccine action is “leaky,” then the benefit threshold (the efficacy of  $n$ -fold fractionated doses necessary to reduce IAR) is higher than  $1/n$  and increases with transmission intensity. This occurs because under the leaky model each infectious bite is assumed to be less likely to cause infection if the host is vaccinated, but the probability of infection grows as the person receives more infectious bites. Figure 3 shows, under the leaky model of vaccine action, dose fractionation is much less beneficial if vaccine action is leaky, efficacy is modest, and  $R_0$  is high.

A recent study suggested that the mosquito biting rate for individuals aged 20 or above is 1.22 times higher than those age under 20.<sup>24</sup> We performed a sensitivity analysis to show that our results are unaffected by such heterogeneity. See “Heterogeneity in biting rates” in the appendix for details.

**Vaccination of adults with fractionated doses and children with standard doses.** Given the lack of immunogenicity data for fractionated doses in children and evidence of lower seroconversion rates to standard doses,<sup>25</sup> a conservative strategy would be to fractionate doses only for adults while providing full doses to children. Figure 4A shows the fold-increase in vaccine coverage that could be achieved with five-fold fractionation in adults only, as a function of proportion of adults in the population ( $p$ ). Adult fractionation increases coverage more if a larger fraction of the population is adults. In Angola in 2015 approximately 57% of the population was adults (15 and older). If there were enough standard-dose vaccine supplies to cover 70% of such a population, fractionation of only the adult doses would increase the coverage by a factor of 1.43 to 100%. Figure 4B-C shows the same calculations as Figure 2A-B where the five-fold fractional-dose vaccine efficacy is 60%. These calculations all assume that there is no preexisting immunity in children or adults; if preexisting immunity existed mainly in adults, then prioritizing children would have a greater benefit than projected here.



## DISCUSSION

Our primary analysis shows that dose-fractionation of YF vaccine, if there were no loss of efficacy, could provide a substantial benefit to reducing the attack rate of YF in a population. We consider this assumption of full efficacy for five-fold fractionation to be the most likely scenario, despite the lack of efficacy data on any YF vaccine, for several reasons: 1) two studies of five- or greater-fold vaccination doses have shown indistinguishable immunogenicity in humans; 2) at least some preparations of YF vaccine substantially exceed the WHO minimum standard for potency of 1,000 IU/dose, so fractionation at some level could be performed without dropping below that threshold; 3) YF vaccine is live attenuated virus, so a biological rationale exists that if a productive vaccine-virus infection can be established by a fractionated dose, protection should be comparable to that with a higher dose. Nonetheless, to assess the robustness of the conclusion that dose-fractionation is likely to be beneficial, against the possibility that in fact efficacy of fractionated doses is lower than anticipated, we consider the possibility that five-fold fractionated dosing fails to immunize a proportion  $(1-VE(5))$  of recipients. Consistent with intuition, we find that as long as at least 20% of recipients are fully immunized by the vaccine, more people would be immunized by vaccinating five times as many people with one-fifth the dose, and so the population-wide benefits of higher coverage would outweigh the lower efficacy of fractionated dosing for individual vaccinees. Even more unlikely, in our opinion, is that fractionated doses would be less efficacious according to a “leaky” model, in which all vaccinated individuals were imperfectly protected against infection from each infectious bite, with the same probability of infection from each bite, reduced by vaccine by a proportion  $VE$ . If this were the case, then especially in high-transmission areas, the fractionated-dose vaccine would need to be 80-90% efficacious to provide a benefit over standard dosing.

Based on the limited evidence on immunogenicity of fractional doses of YF vaccine to date, we consider it unlikely that reducing the dose five-fold or perhaps further from current preparations would result in dramatically lower efficacy of the leaky type. Visual inspection of the data from a dose-fractionation trial of the 17DD vaccine in Brazil shows that for doses down to 47x below the standard dose, the distribution of serologic responses was indistinguishable from those for the standard dose, suggesting that efficacy should be nearly equivalent to that for full doses. This was confirmed by the analysis of peak viremia, which was equivalent for standard dose and for doses down to 11% of the full dose (9-fold fractionation). It was further confirmed by peak cytokine responses, which were comparable to the standard dose for all cytokines tested, down to at least a 9-fold fractional dose. For even lower doses, the proportion seroconverting after vaccination was lower than the 97% observed for the full dose, but the antibody response among the seroconverters appears to be similar at all doses.<sup>9</sup> These data collectively suggest that down to approximately 9-fold fractional dosing of this vaccine the response should be equivalent, and that for further fractionation there may be a failure to induce any substantial response in a fraction of recipients, but the neutralizing antibody titres in those who do respond should be comparable. This pattern is consistent with an all-or-nothing model.

Our analysis is not intended to recommend extending coverage to the point of knowingly compromising efficacy. Rather, our analysis indicates that a strategy of fractionation to a dose that provides equivalent immunogenicity to standard dosing would be greatly beneficial if efficacy is equivalent to standard dosing, and would still be beneficial if, unexpectedly, efficacy was somewhat lower than standard dosing.

We have used five-fold fractionation as an example because it is the strategy with the best evidence base of equal immunogenicity. However, some data suggest that more than five-fold fractionation could be equally immunogenic, and of course the benefits of fractionation would be greater if more than five-fold fractionation were logistically possible and comparably efficacious.

On programmatic grounds a simpler strategy -- such as fractionated dosing for all -- may be preferred to a more complex strategy that gives different doses to different groups, say age groups. While either would provide epidemiologic benefit, the choice between such strategies would be influenced by the number of available doses, logistical barriers, and location-specific regulations regarding specific groups, such as children. Another group of interest are travelers, for whom we must also consider longevity of response, lower levels of exposure, and more detailed discussions on equity outside the scope of this modeling paper. The cost of fractional-dose strategies will depend on the route of administration, but could potentially be substantially less expensive per vaccine recipient.<sup>18</sup>

Our simple model has several limitations. We assume homogeneous mixing of the population (reasonable at least locally for a vector-borne disease) and neglect preexisting immunity in our main results, though the Methods show how our calculations could be modified to consider preexisting immunity. The purpose is to provide basic calculations for the most at-risk populations, those with little preexisting immunity. We also fix a particular value of  $R_0$  for each calculation, and assume this value is maintained until the epidemic has swept through a population. In reality,  $R_0$  will vary seasonally as vector abundance, extrinsic incubation period, and other factors vary. The existence of a high-transmission season might enhance the benefits of fractional-dose vaccination. Most importantly, there will be a premium on achieving high vaccine coverage before the peak of transmission to maximally impact transmission, and this will be limited by supply constraints that could be partially relieved by fractionation.

We conclude that dose fractionation could be a very effective strategy for improving coverage of YF vaccines and reducing infection attack rate in populations -- possibly by a large absolute and relative margin -- if high to moderate efficacy is maintained by reduced-dose formulations. For vaccines whose standard formulations exceed WHO minimum concentration of viral particles,<sup>10</sup> this dose-fractionation could be accomplished without changing the WHO recommendations. Even if the efficacy of fractionated doses were substantially lower than expected, increasing coverage by a factor greater than the reduction in efficacy would still be predicted to reduce the population-wide infection attack rate. Substantial benefits could also be achieved if fractional doses were given only to adults while providing standard-dose vaccines to children. We urge consideration of means to implement dose-fractionation as a component

329 of a YF response strategy for the current situation. Rollout of fractionated dosing should  
 330 perhaps be preceded or accompanied by noninferiority studies of the intended vaccine's  
 331 immunogenicity at fractional doses in the intended populations. Ongoing programs should be  
 332 monitored by observational studies of safety, immunogenicity and, if possible, effectiveness<sup>18</sup>  
 333 to assure that the assumptions underlying the rationale for such programs continue to be met.  
 334 However, it is worth noting that if full-dose vaccine efficacy is indeed 100% or nearly so as  
 335 currently believed, estimating the relative efficacy of fractional vs. standard doses in a  
 336 comparative study would be challenging or impossible, as there might be few or no cases  
 337 accrued in the standard-dose arm.

## REFERENCES

- 1 World Health Organization. Situation Report: Yellow Fever. Geneva, Switzerland, 2016  
<http://apps.who.int/iris/bitstream/10665/242438/1/yellowfeversitrep-16Jun2016-eng.pdf?ua=1>.
- 2 Woodall J, Yuill T. Why is the yellow fever outbreak in Angola a ‘threat to the entire world’? *Int J Infect Dis* 2016; : 1–4.
- 3 Monath TP, Woodall JP, Gubler DJ, *et al.* Yellow fever vaccine supply: a possible solution. *Lancet* 2016; **387**: 1599–600.
- 4 Barrett AD. Yellow Fever in Angola and Beyond — The Problem of Vaccine Supply and Demand. *N Engl J Med* 2016; : NEJMp1606997.
- 5 Schnirring L. WHO plans to stretch vaccine as yellow fever persists in Africa. CIDRAP News. 2016. <http://www.cidrap.umn.edu/news-perspective/2016/06/who-plans-stretch-vaccine-yellow-fever-persists-africa>.
- 6 Riley S, Wu JT, Leung GM. Optimizing the dose of pre-pandemic influenza vaccines to reduce the infection attack rate. *PLoS Med* 2007; **4**: 1032–40.
- 7 Brearley L, Eggers R, Steinglass R, Vandelaer J. Applying an equity lens in the Decade of Vaccines. *Vaccine* 2013; **31**: B103–7.
- 8 Roukens AH, Vossen AC, Bredenbeek PJ, van Dissel JT, Visser LG. Intradermally Administered Yellow Fever Vaccine at Reduced Dose Induces a Protective Immune Response: A Randomized Controlled Non-Inferiority Trial. *PLoS One* 2008; **3**: e1993.
- 9 Campi-Azevedo AC, de Almeida Estevam P, Coelho-Dos-Reis JG, *et al.* Subdoses of 17DD yellow fever vaccine elicit equivalent virological/immunological kinetics timeline. *BMC Infect Dis* 2014; **14**: 391.
- 10 World Health Organization. Expert Committee on Biological Standardization. Requirements for yellow fever vaccine. Geneva, Switzerland, 2008.
- 11 Staples JE, Gershman M, Fischer M. Yellow Fever Vaccine: Recommendations of the Advisory Committee. *Morb Mortal Wkly Rep* 2010; **59**: 1–27.
- 12 Fine P, Eames K, Heymann DL. ‘Herd immunity’: A rough guide. *Clin Infect Dis* 2011; **52**: 911–6.
- 13 Wallinga J, Teunis P. Different Epidemic Curves for Severe Acute Respiratory Syndrome Reveal Similar Impacts of Control Measures. *Am J Epidemiol* 2004; **160**: 509–16.
- 14 World Health Organization. Yellow fever outbreak in Angola: Situation Report. 2016  
[http://www.afro.who.int/index.php?option=com\\_docman&task=doc\\_download&gid=10121&Itemid=2593](http://www.afro.who.int/index.php?option=com_docman&task=doc_download&gid=10121&Itemid=2593).
- 15 Johansson MA, Arana-Vizcarrondo N, Biggerstaff BJ, Staples JE. Incubation Periods of Yellow Fever Virus. *Am J Trop Med Hyg* 2010; **83**: 183–8.
- 16 Hindle E. The Transmission of Yellow Fever. *Lancet* 1930; **219**: 835–42.
- 17 Johansson MA, Arana-Vizcarrondo N, Biggerstaff BJ, Gallagher N, Marano N, Staples JE.

- Assessing the risk of international spread of yellow fever virus: a mathematical analysis of an urban outbreak in Asuncion, 2008. *Am J Trop Med Hyg* 2012; **86**: 349–58.
- 18 Hickling J, Jones R, Tandem W. Yellow fever vaccination: The potential of dose-sparing to increase vaccine supply and. *Path* 2013. <http://www.path.org/publications/detail.php?i=2285>.
- 19 Diekmann O, Heesterbeek J. Mathematical Epidemiology of Infectious Diseases: Model Building, Analysis and Interpretation. New York: Wiley, 2000.
- 20 Radcliffe J, Rass L. The Spatial Spread and Final Size of Models for the Deterministic Host-Vector Epidemic. *Math Biosci* 1984; **70**: 123–46.
- 21 World Health Organization. Rapid field entomological assessment during yellow fever outbreaks in Africa. Geneva, Switzerland, 2014.
- 22 Smith PG, Rodrigues LC, Fine PEM. Assessment of the Protective Efficacy of Vaccines against Common Diseases Using Case-Control and Cohort Studies. *Int J Epidemiol* 1984; **13**: 87–93.
- 23 Halloran ME, Longini IM, Struchiner CJ. Design and Analysis of Vaccine Studies: Introduction. New York, NY: Springer, 2010.
- 24 Harrington LC, Fleisher A, Ruiz-Moreno D, *et al*. Heterogeneous Feeding Patterns of the Dengue Vector, *Aedes aegypti*, on Individual Human Hosts in Rural Thailand. *PLoS Negl Trop Dis* 2014; **8**.
- 25 Belmusto-Worn VE, Sanchez JL, McCarthy K, *et al*. Randomized, double-blind, phase III, pivotal field trial of the comparative immunogenicity, safety, and tolerability of two yellow fever 17D vaccines (Arilvax and YF-VAX) in healthy infants and children in Peru. *Am J Trop Med Hyg* 2005; **72**: 189–97.
- 26 Martins RM, Maia M de LS, Farias RHG, *et al*. 17DD yellow fever vaccine: a double blind, randomized clinical trial of immunogenicity and safety on a dose-response study. *Hum Vaccin Immunother* 2013; **9**: 879.
- 27 World Health Organization. Situation Report: Yellow Fever. Geneva, Switzerland, 2016 [http://apps.who.int/iris/bitstream/10665/208880/1/yellowfeversitrep\\_9Jun2016\\_eng.pdf?ua=1](http://apps.who.int/iris/bitstream/10665/208880/1/yellowfeversitrep_9Jun2016_eng.pdf?ua=1).
- 28 Pan American Health Organization. Control of Yellow Fever: Field Guide. Washington DC, USA, 2005 [https://www.google.com/url?sa=t&rct=j&q=&esrc=s&source=web&cd=1&ved=0ahUKEwjw15GlganNAhWFLyYKHUIlDvgQFggeMAA&url=http://www.paho.org/hq/index.php?option=com\\_docman&task=doc\\_download&gid=14606&Itemid=&usg=AFQjCNF2BDqUicDur0YzeGR-I7Lkd1wvbQ](https://www.google.com/url?sa=t&rct=j&q=&esrc=s&source=web&cd=1&ved=0ahUKEwjw15GlganNAhWFLyYKHUIlDvgQFggeMAA&url=http://www.paho.org/hq/index.php?option=com_docman&task=doc_download&gid=14606&Itemid=&usg=AFQjCNF2BDqUicDur0YzeGR-I7Lkd1wvbQ).

# Contributors

JTW, CMP, and ML reviewed the literature and designed the study. JTW and ML developed the mathematical model. JTW ran the mathematical model. JTW, CMP, GML, and ML interpreted the model results and approved the final version.

415  
416  
417  
418  
419  
420  
421  
422  
423  
424  
425  
426  
427  
428  
429  
430

**Declaration of interests**

ML reports consulting honoraria (which have been donated to charity) from Pfizer and Affinivax, and research funding through his institution from Pfizer and PATH Vaccine Solutions, all unrelated to yellow fever. JTW, CMP, and GML have no conflicts of interest.

**Acknowledgements**

We thank Jack Woodall and Rebecca Grais for comments on an earlier draft and Alejandro Costa and the students of EPI 260 for helpful discussions. This study was funded by Cooperative Agreement U54GM088558 from the National Institute Of General Medical Sciences, National Research Service Award T32AI007535-16A1, and a commissioned grant from the Health and Medical Research Fund from the Government of the Hong Kong Special Administrative Region. The content is solely the responsibility of the authors and does not necessarily represent the official views of the National Institute Of General Medical Sciences or the National Institutes of Health.

## **Panel: Research in context**

### **Systematic review**

We searched PubMed and Google Scholar on June 10, 2016, with the terms “yellow fever” and “vaccine” or “dose sparing”. We did not find any reports of randomized trials of yellow fever (YF) vaccine efficacy, at full or lower doses. Three relatively recent studies suggest similar immunological responses at five-fold, or more, fractionation as compared to the current dose antigen levels.<sup>8,9,26</sup> While several recent perspective articles propose the dose-sparing strategy in response to the current shortage,<sup>2–4</sup> to our knowledge this is the first study to test the intuition behind the strategy and assess the implications of uncertainties surrounding fractional-dose YF vaccine efficacy and mode of action (e.g. “all-or-nothing” and “leaky”).

### **Added value of the study**

Our study provides a formal confirmation of intuition that dose-sparing can drastically reduce the number of YF cases if high vaccine efficacy is retained. We show how the benefits of dose fractionation are influenced by the transmission intensity of the setting, the target coverage, and the fractional-dose vaccine efficacy and mode of action.

### **Interpretation**

Our results support the growing evidence that dose-sparing strategies should be explored as an option for extending the currently sparse YF vaccine supply.

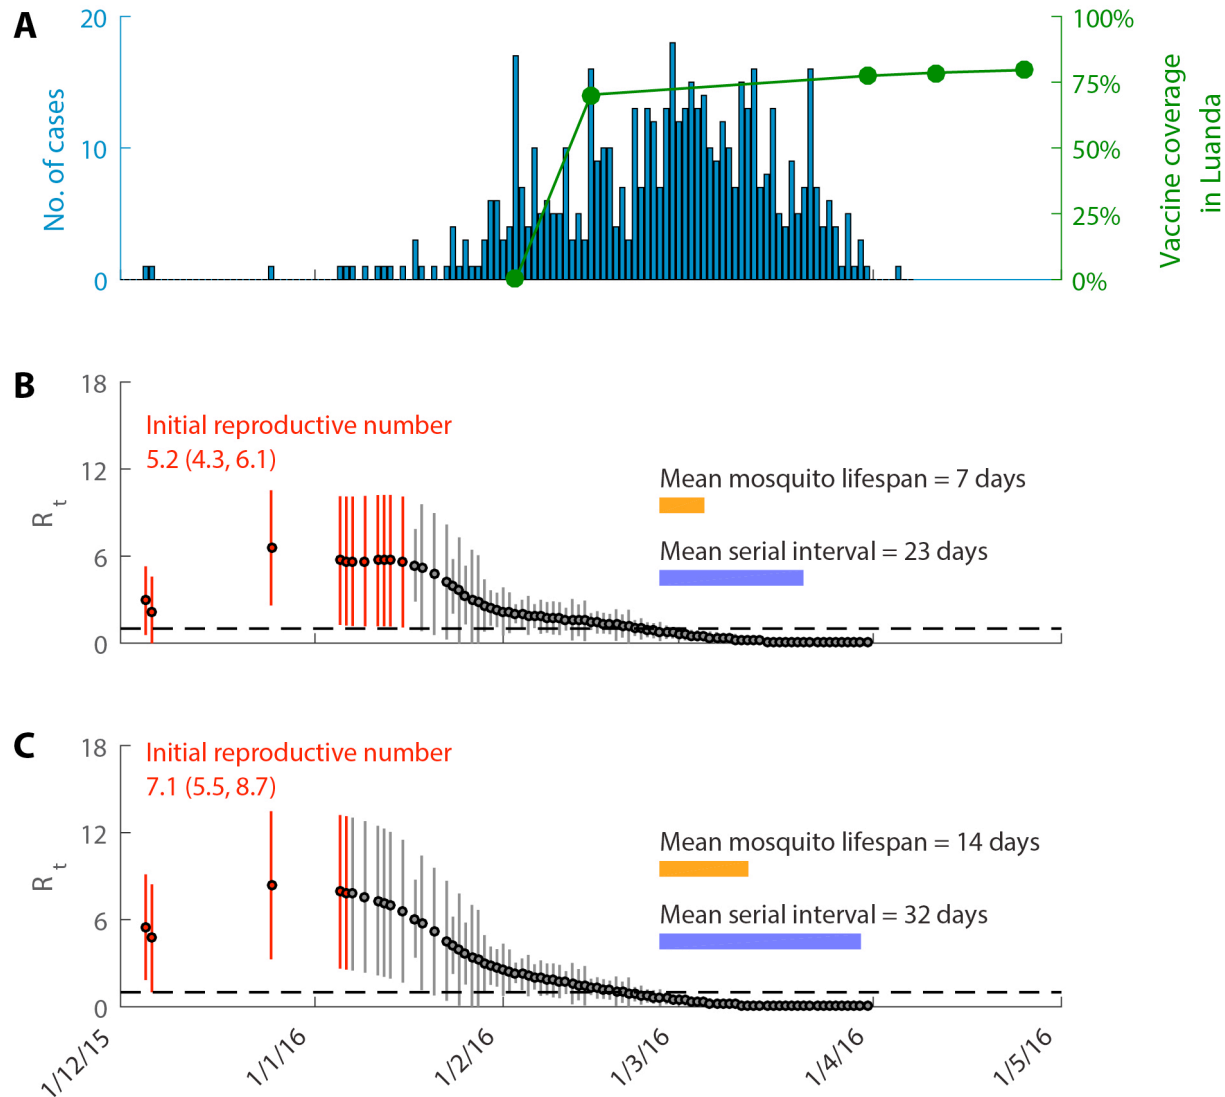

**Figure 1: Estimates of reproductive number over the course of the Angola epidemic. A**

Epidemic curve of confirmed cases by dates of symptom onset in Angola and vaccine coverage in Luanda province achieved by the reactive YF vaccination campaign that started on 2 February 2016.<sup>27</sup> The first cases of this YF outbreak were identified in Luanda province which accounted for 90 of the 121 cases confirmed in Angola up to 26 February 2016. **B-C** Estimates of the daily reproductive number ( $R_t$ ) assuming that the mean mosquito lifespan was 7 and 14 days, respectively. The red data points correspond to the cases that were used to estimate the initial reproductive number. These cases had symptom onset one mean serial interval before the vaccination campaign began to affect disease transmission (which was assumed to be 7 days after the start of the campaign to account for the time it takes for adaptive immunity to develop). The orange and purple horizontal bars indicate the length of the mean mosquito lifespan and serial interval on the scale of the x-axis, respectively.



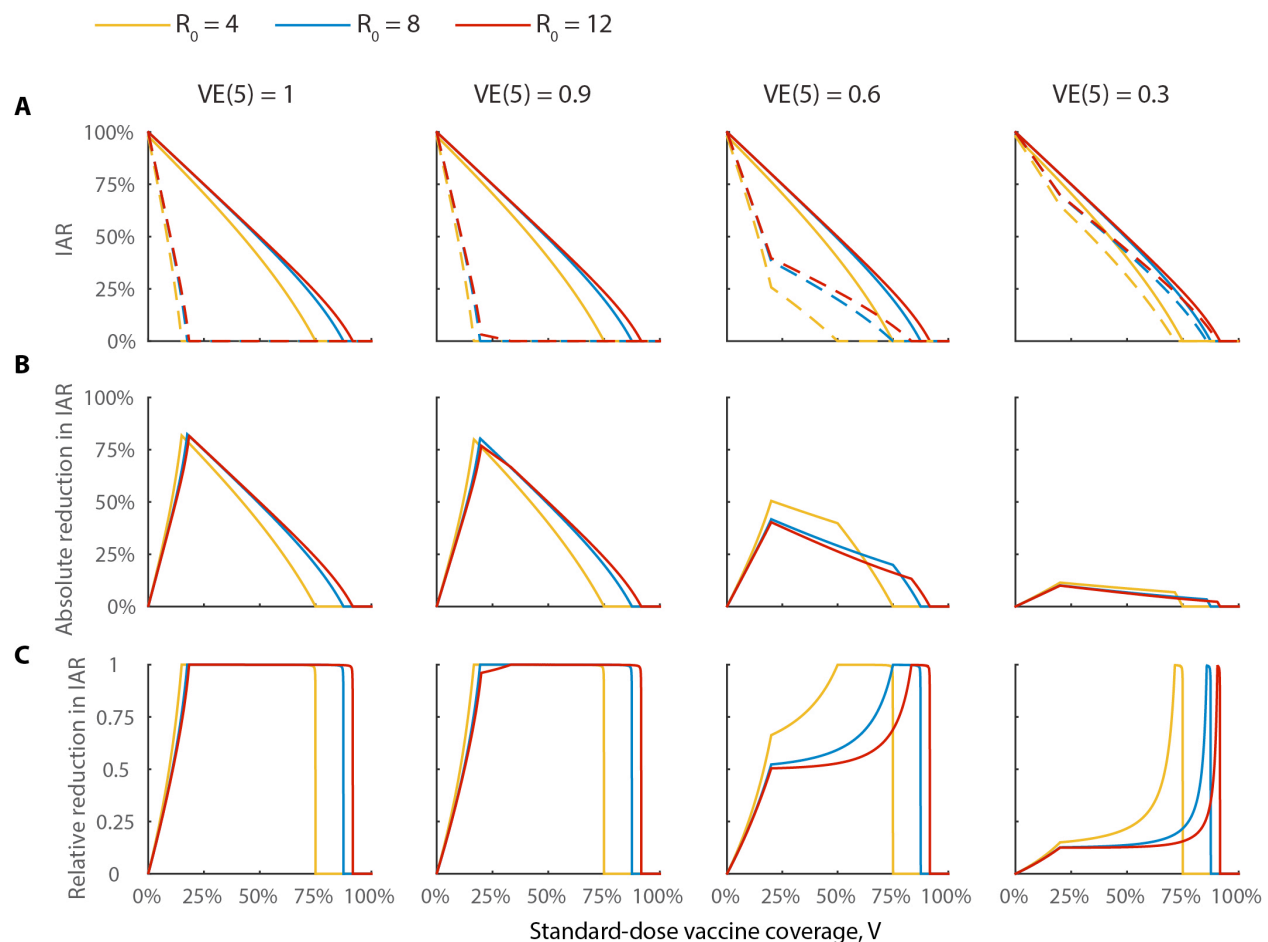

**Figure 2: The impact of five-fold fractional-dose vaccination with different vaccine efficacy and reproductive numbers.** Vaccine action is assumed to be all-or-nothing and standard-dose vaccine efficacy is assumed to be 1. If the standard-dose vaccine coverage  $V$  exceeds 20%, then everyone in the population can be vaccinated under five-fold fractionated-dose vaccination, in which case the fractionation would only be  $n = 1/V$ . **A** Infection attack rate (IAR) as a function of standard-dose vaccine coverage,  $V$ . The solid and dashed curves correspond to standard-dose and five-fold fractional-dose vaccination, respectively. IAR is reduced to 0 when the effective vaccine coverage ( $V$  for solid curves,  $VE(n) \times nV$  for dashed curves) reaches the herd immunity threshold  $(1-1/R_0) \times 100\%$ . **B** Absolute reduction in IAR. IAR reduction is maximum when the five-fold fractional-dose effective vaccine coverage  $VE(5) \times 5V$  reaches the herd immunity threshold  $(1-1/R_0) \times 100\%$ . As  $V$  increases from 0, a kink appears when the herd-immunity threshold is attained or everyone is vaccinated under five-fold fractional-dose vaccination (i.e.,  $V = 20\%$ ). If five-fold fractional-dose vaccination at 100% coverage cannot attain the herd immunity threshold (because of low fractional-dose vaccine efficacy), then a second kink appears when  $V$  is large enough such that fractional-dose vaccination attains herd-immunity

485 threshold due to the increase in  $VE(n)$  resulting from lower fractionation factors (namely  $n =$   
 486  $1/V$ ). **C** Relative reduction in IAR.

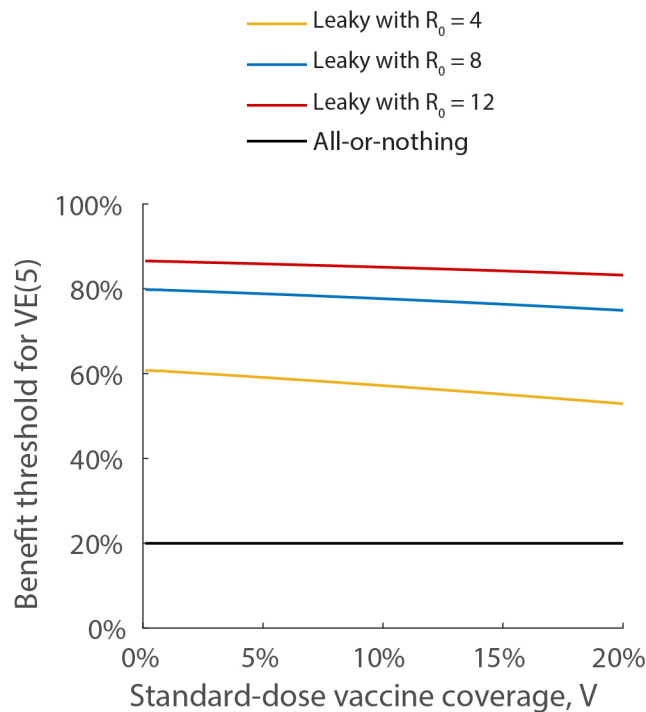

**Figure 3: Benefit thresholds for leaky vaccines as a function of standard dose vaccine supply  $V$  and basic reproductive number  $R_0$ .** Five-fold fractionated dosing will reduce IAR compared to standard dosing if the leaky vaccine efficacy of fractional-dose is above the line corresponding to the basic reproductive number. This threshold becomes high for large values of  $R_0$  because under the “leaky” model of vaccine efficacy, multiple exposures eventually lead to infection of vaccinated individuals, overcoming their protection from the vaccine.

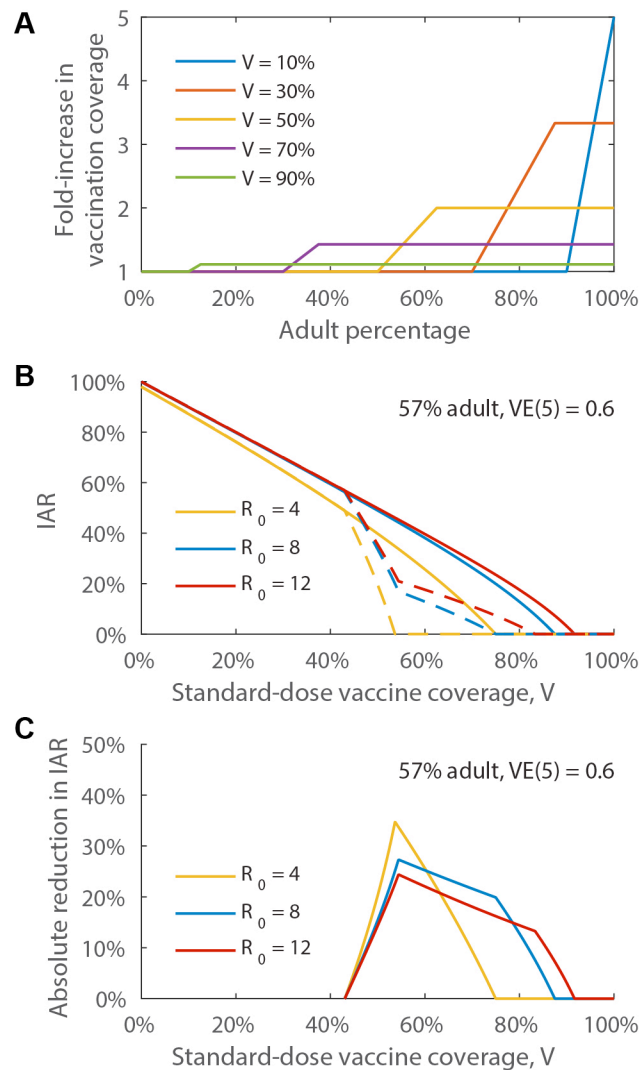

**Figure 4: Vaccination of adults with fractionated doses and children with standard doses.** All children are vaccinated with standard-dose vaccines before any adults receive vaccination. **A** Fold-increase in the proportion of individuals vaccinated conferred by five-fold fractionated dose vaccination. **B-C** Same as Figure 2A-B when 57% of the population are adults and five-fold fractional-dose vaccine efficacy is 60%.

## Appendix

### Estimation of the effective reproductive number for YF in Angola

We use the Wallinga and Teunis method<sup>13</sup> to estimate the reproductive number over the course of the YF outbreak in Angola from the daily number of confirmed cases recorded in the 17 April 2016 WHO Angola Situation Report.<sup>14</sup> We assume that all cases were attributed by local transmission, i.e. no importation of cases. Let  $t_i$  be the date of symptom onset for case  $i$ . The relative likelihood that case  $i$  has been infected by case  $j$  is

$$p_{ij} = \frac{w(t_j - t_i)}{\sum_{k \neq j} w(t_j - t_k)}$$

where  $w(\cdot)$  is the probability density function of the serial interval. Assuming that the probability of case  $j$  infecting case  $i$  is independent of the probability of case  $j$  infecting any other case, the reproductive number for case  $j$  is a Bernoulli random variable with mean  $\sum_i p_{ij}$ . The reproductive number on day  $t$ , namely  $R_t$ , is approximated as the average of the reproductive number of all cases who have symptom onset on day  $t$ , in which case the mean and standard deviation of  $R_t$  are

$$E[R_t] = \frac{1}{n_t} \sum_{j: t_j = t} \sum_i p_{ij}$$

$$s(R_t) = \frac{1}{n_t} \sqrt{\sum_i \left( \sum_{j: t_j = t} p_{ij} (1 - p_{ij}) - \sum_{j, k: t_j = t, j \neq k} p_{ij} p_{ik} \right)}$$

Assuming that  $R_t$  is normally distributed, the approximate  $(1-\alpha) \times 100\%$  confidence interval is  $E[R_t] \pm z_{1-\alpha/2} s(R_t)$ .

### Estimation of the serial interval distribution for YF

We assume that the latent period is the same as the incubation period for all human infections of YF. Suppose an infected individual becomes infectious at time 0. Let  $t_1$  be the time at which the infectious individual is bitten by a competent mosquito which becomes infected,  $t_2$  be the time at which this mosquito becomes infectious, and  $t_3$  be the time at which this mosquito bites and infects a human host. The probability distribution function for the serial interval is

$$f(a) = \frac{h(a)}{\int_0^\infty h(u) du}$$

where

$$h(a) = \int_0^a \int_0^{t_3} \int_0^{t_2} \underbrace{P(I > t_1)}_{\substack{\text{Probability that the} \\ \text{human infectious period} \\ \text{exceeds } t_1 \text{ days when} \\ \text{the mean infectious duration} \\ \text{is mean 4 days.}}} \cdot \underbrace{f_V(t_2 - t_1)}_{\substack{\text{Extrinsic incubation period} \\ \text{at 28 degree Celsius; Weibull} \\ \text{distributed with mean 12.7 days} \\ \text{and CoV 0.61}}} \cdot \underbrace{e^{-d(t_3 - t_1)}}_{\substack{\text{Probability that the} \\ \text{mosquito is still alive} \\ t_3 - t_1 \text{ days after getting} \\ \text{infected}}} \cdot \underbrace{f_H(a - t_3)}_{\substack{\text{Intrinsic incubation period;} \\ \text{Lognormal distributed with} \\ \text{mean 4.6 days and CoV 0.36}}} dt_1 dt_2 dt_3$$

In this calculation, we assume that the infectious period in humans is exponentially distributed with mean 4 days,<sup>28</sup> and mosquito lifespan is exponentially distributed with mean varying over 1-2 weeks (<http://www.dengue.gov.sg/subject.asp?id=12;17>). We assume that the extrinsic incubation period follows the Weibull distribution with parameters  $\nu = 1.7$  and  $\lambda_i = \exp(-7.6 + 0.11T)$  where  $T$  is the temperature (28 degrees Celsius) as estimated by ref.<sup>15</sup> We assume that the intrinsic incubation period follows the lognormal distribution with parameters  $\mu = 1.46$  and  $\tau = 8.1$  as estimated by ref.<sup>15</sup>.

### Dose-response relationship

We assume that vaccine efficacy of n-fold fractional-dose vaccines for  $n$  between 1 and 5 increases linearly with the amount of antigen in the vaccines which is proportional to  $1/n$ . In general, if vaccine efficacy of n-fold fractional-dose vaccines for  $n$  between  $n_1$  and  $n_2$  increases linearly with the amount of antigen in the vaccines, then

$$VE(n) = VE(n_2) + \frac{1/n - 1/n_2}{1/n_1 - 1/n_2} (VE(n_1) - VE(n_2)).$$

We make this assumption to avoid overestimating the benefit of dose-fractionation because:

1. If  $VE(5)$  is at the all-or-nothing benefit threshold, namely  $VE(1)/5$ , then  $VE(n)$  is also at the benefit threshold (i.e.  $VE(n) = VE(1)/n$ ) for all  $n$  between 1 and 5. That is, if five-fold dose fractionation is not beneficial, then dose-fractionation is not beneficial for all fractionation below five-fold.
2. The reduction in vaccine efficacy as fractionation increases from 1 is likely to be more gradual than what we have assumed here given that standard dose vaccine efficacy appears to be close to 100%.

Appendix Figure 1 illustrates this dose-response relationship for different values of  $VE(5)$  with  $VE(1) = 1$ .

### Infection attack rate

We first provide mathematical details on IAR calculations for the case where the population is not stratified into subgroups. If vaccine action is all-or-nothing, then IAR with fractionation  $n$ , denoted by  $IAR(n)$ , is obtained by solving the equation

$$IAR(n) = S_0 (1 - VE(n)nV) [1 - \exp(-R_0 \cdot (I_0 + IAR(n)))]$$

where  $R_0$  is the basic reproductive number,  $S_0$  and  $I_0$  are the initial proportion of population that are susceptible and infectious. As such, dose-fractionation reduces IAR if and only if  $VE(n) > VE(1)/n$ . If vaccine action is leaky, then  $IAR(n)$  is obtained by solving the equation

$$IAR(n) = S_0(1 - Vn) \left[ 1 - \exp(-R_0 \cdot (I_0 + IAR(n))) \right] + S_0 Vn \left[ 1 - \exp(-(1 - VE(n))R_0 \cdot (I_0 + IAR(n))) \right]$$

In this case, dose-fractionation reduces IAR if and only if

$$VE(n) > 1 + \frac{\ln(1 - Z)}{R_0(I_0 + IAR(1))} \quad \text{where } Z = \frac{IAR(1)}{S_0 Vn} - \left( \frac{1}{Vn} - 1 \right) \left[ 1 - \exp(-R_0 \cdot (I_0 + IAR(1))) \right]$$

In the special case where  $VE(1) = 1$ , the benefit threshold can be simplified as

$$VE(n) > 1 - \frac{\ln \left( 1 - (1 - 1/n) \frac{IAR(1)}{S_0(1 - V)} \right)}{\ln \left( 1 - \frac{IAR(1)}{S_0(1 - V)} \right)}.$$

Next, we provide mathematical details on IAR calculations for the general case where there are  $m$  groups. Let  $S_{0,i}$  and  $I_{0,i}$  be the proportion of susceptible and infectious people in group  $i$  just before the vaccination campaign begins. Let  $V_i$  be the vaccine coverage of standard-dose vaccines for group  $i$ . If  $n_i$  is the fractionation for group  $i$ , then vaccine coverage of fractional-dose vaccines for group  $i$  is  $V_i n_i$ . Let  $R_0^{j,i}$  be the expected number of secondary infections in group  $j$  caused by one infection in group  $i$  in a completely susceptible population. If vaccine action is all-or-nothing, the group-specific IARs are obtained by solving the equations

$$IAR_i(n_i) = S_{0,i} (1 - V_i n_i VE(n_i)) \left[ 1 - \exp \left( - \sum_j R_0^{j,i} (I_{0,j} + IAR_j(n_j)) \right) \right]$$

If vaccine action is leaky, then the group-specific IARs are obtained by solving the equations

$$IAR_i(n_i) = S_{0,i} (1 - n_i V_i) \left[ 1 - \exp \left( - \sum_j R_0^{j,i} (I_{0,j} + IAR_j(n_j)) \right) \right] + S_{0,i} n_i V_i \left[ 1 - \exp \left( - (1 - VE(n_i)) \sum_j R_0^{j,i} (I_{0,j} + IAR_j(n_j)) \right) \right]$$

## **Heterogeneity in biting rates**

A recent study suggested that the mosquito biting rate for individuals aged 20 or above is 1.22 times higher than those age under 20.<sup>24</sup> To test the robustness of our results against such heterogeneity, we repeat the calculations in Figure 2 and 3 using a model in which the population is stratified with age 20 as the cutoff. For illustration, we use the demographic parameters of Angola where around 55% of the population are under 20. Appendix Figures 2-3 show that our results are unaffected by heterogeneity in biting rates.



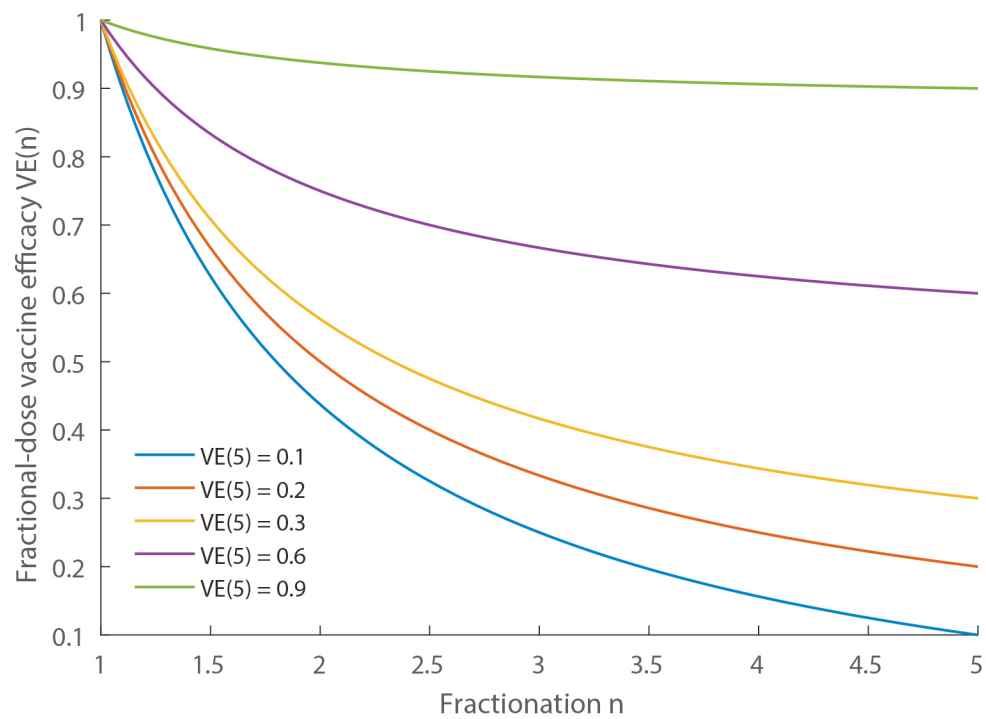

**Appendix Figure 1. The dose response relationship assumed in the model with  $VE(1) = 1$ .**

589

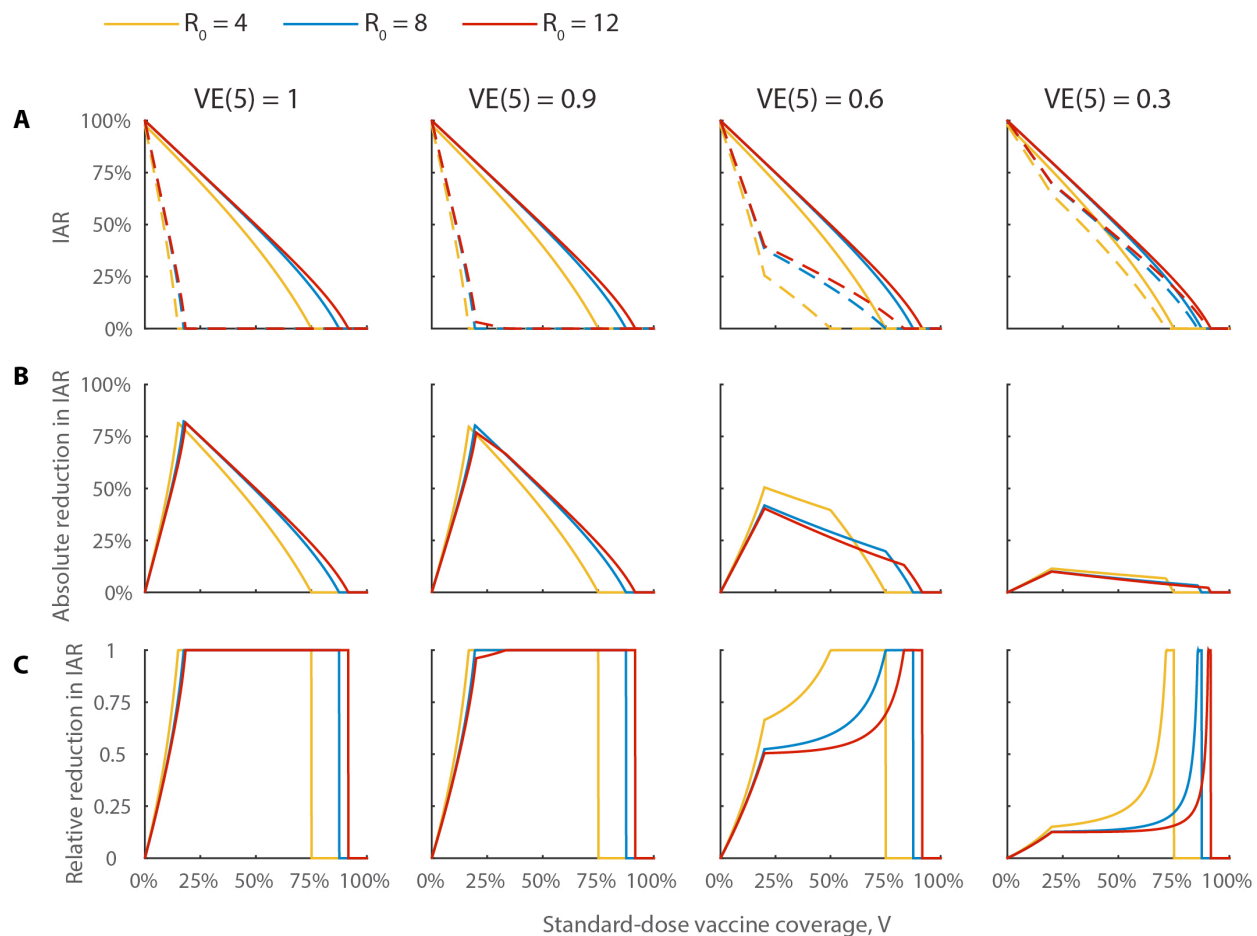

590

591

592 **Appendix Figure 2. Repeating the calculations in Figure 2 using a 2-age-group model in which those 20**  
 593 **or older were 1.22 times more likely to be bitten by mosquitoes compared to those under age 20. The**  
 594 **results are essentially the same as that in Figure 2.**

595

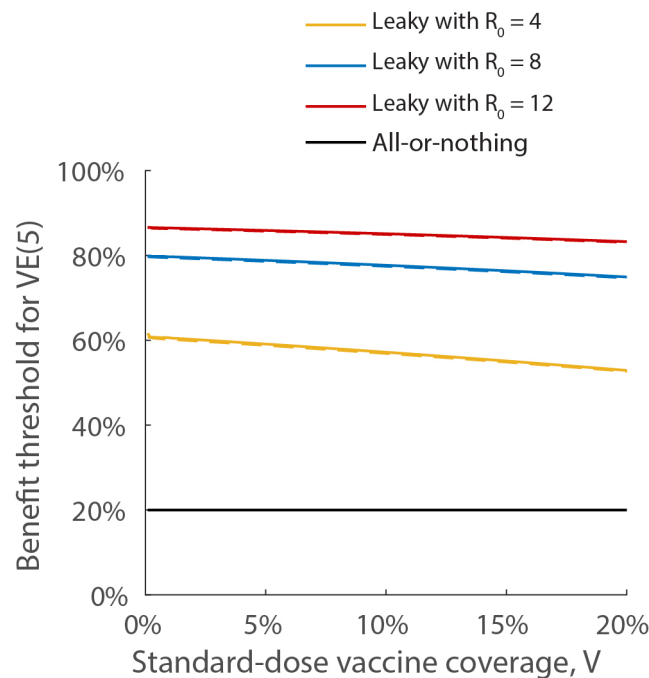

**Appendix Figure 3. Repeating the calculations in Figure 3 using a 2-age-group model in which those 20 or older were 1.22 times more likely to be bitten by mosquitos compared to those under age 20. The solid and dashed curves show the results without and with age stratification, respectively.**
